# Supplementary material for: Surfactant-Free Synthesis of Single Crystalline SnS2and Effect of Surface Atomic Structure on the Photocatalytic Property
Source: Hindawi journal article supplement (doi:10.1155/2014/394146), 2014-01-01
Supplement: f1 [file 394146.f1.pdf]

## Supporting information

# Surfactant-free Synthesis of SingleCrystalline SnS<sub>2</sub> and Effect of Surface Atomic Structure on the Photocatalytic Property

Mengyi Li<sup>1</sup>, Enzuo Liu<sup>1,2</sup>, Huilin Hu<sup>1</sup>, ShuxinOuyang<sup>1,2</sup>, Hua Xu<sup>1,2</sup>, Defa Wang<sup>1,2 \*</sup>

<sup>1</sup>TU-NIMS Joint Research Center, and Tianjin Key Laboratory of Composite and Functional Materials, School of Materials Science and Engineering, Tianjin University, 92 Weijin Road, Nankai District, Tianjin 300072, China

<sup>2</sup>Collaborative Innovation Center of Chemical Science and Engineering (Tianjin), 92 Weijin Road, Nankai District, Tianjin 300072, China

### S1. Calculation of Surface Energy

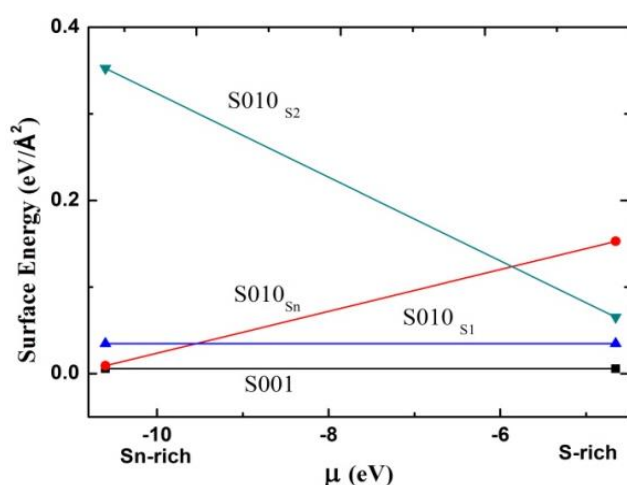

FIGURE S1: Surface energy changes of S001, S010<sub>S1</sub>, S010<sub>S2</sub> and S010<sub>Sn</sub> facets with the condition from Sn-rich to S-rich.

The surface energy ( $\gamma$ ) of each facet was calculated by the following formula:

$$\gamma = \frac{E_{\text{slab}} - nE_{\text{bulk}} - mE_0}{2A},$$

---

\* Correspondence should be addressed to Defa Wang; E-mail: [defawang@tju.edu.cn](mailto:defawang@tju.edu.cn)

Where  $E_{\text{slab}}$  is the total energy of the slab,  $n$  is the total number of  $\text{SnS}_2$  unit cells contained in the slab model,  $E_{\text{bulk}}$  is the energy per unit cell of  $\text{SnS}_2$ ,  $m$  is obtained by subtracting  $n$  Sn atoms and  $2n$  S atoms from the number of Sn and S atoms in the surface slab.  $E_0$  is the chemical potential of the extra atom species. The calculated surface energies are  $0.0065$  and  $0.034 \text{ eV}/\text{\AA}^2$  for  $\text{S001}$  and  $\text{S010}_{\text{S1}}$  facets, respectively.

“The result shows that compare to the  $\{010\}$  surface, the  $\{001\}$  surface owns lower surface energy, meaning that the  $\{001\}$  facet is more stable than the  $\{010\}$  surface.”
